# Supplementary material for: An efficient sorghum transformation system using embryogenic calli derived from mature seeds
Source: PeerJ. 2021 Aug 5;9:e11849. doi: 10.7717/peerj.11849 (PMC8349514; doi:10.7717/peerj.11849)
Supplement: Supplemental Information 2 [file peerj-09-11849-s002.xlsx]

## Sheet: correlation
APRT			TST
Cycle	Rn		Cycle	Rn
1	0.531968		1	0.000427801
2	0.533225		2	0.00142557
3	0.531357		3	-0.000700847
4	0.531595		4	-0.000720891
5	0.534496		5	0.00192137
6	0.533898		6	0.00106435
7	0.533541		7	0.000448203
8	0.533432		8	8.07239e-05
9	0.534528		9	0.000918629
10	0.53556		10	0.00169121
11	0.533517		11	-0.000610085
12	0.532488		12	-0.0018975
13	0.533087		13	-0.00155795
14	0.533382		14	-0.00152095
15	0.533929		15	-0.0012335
16	0.535245		16	-0.000175949			APRT									TST
17	0.534366		17	-0.00131316		cycle	Rn	log(Rn)							cycle	Rn	log(Rn)
18	0.534516		18	-0.00142244		25	0.729568	-0.136934							25	0.191819	-0.717108
19	0.53647		19	0.000272704		26	0.915624	-0.038283							26	0.377616	-0.42295
20	0.541212		20	0.00475609		27	1.25884	0.0999691							27	0.720569	-0.142324
21	0.547201		21	0.0104864		28	1.8378	0.264299							28	1.29928	0.113702
22	0.559266		22	0.0222928		29	2.64386	0.422238							29	2.10508	0.323268
23	0.584363		23	0.0471317		30	3.43859	0.536381							30	2.89955	0.462331
24	0.635222		24	0.0977313
25	0.729568		25	0.191819
26	0.915624		26	0.377616
27	1.25884		27	0.720569
28	1.8378		28	1.29928
29	2.64386		29	2.10508
30	3.43859		30	2.89955
31	4.00246		31	3.46315
32	4.38613		32	3.84657
33	4.66879		33	4.12897
34	4.87919		34	4.33912
35	5.04264		35	4.5023
36	5.16392		36	4.62333
37	5.26128		37	4.72043
38	5.34535		38	4.80424
39	5.40437		39	4.863
40	5.43645		40	4.89482
							ART correlation								TST correlation
